# Supplementary material for: Trans-Graft Protection Against Pierce’s Disease Mediated by Transgenic Grapevine Rootstocks
Source: PubMed Central journal article supplement (PMC6372540; doi:10.3389/fpls.2019.00084), 2019-02-06

Supplementary Materials:

Supplementary Table 1: Field map of genotypes planted in Field 1.

| Row 5     | Row 6     | Row 7     | Row 8     | Row 9     | Vine |
|-----------|-----------|-----------|-----------|-----------|------|
|           | PGIP-1.50 | PGIP-2.25 | PGIP-3.08 | CAP-1.041 | 1    |
|           | PGIP-1.50 | CAP-1.092 | PGIP-3.08 | CAP-1.041 | 2    |
|           | CAP-1.151 | CAP-1.092 | PGIP-3.08 | PGIP-1.50 | 3    |
|           | CAP-1.151 | CAP-1.092 | PGIP-2.25 | PGIP-1.50 | 4    |
|           | CAP-1.151 | PGIP-1.50 | PGIP-2.25 | PGIP-1.50 | 5    |
|           | TS-WT     | PGIP-1.50 | PGIP-2.25 | CAP-1.092 | 6    |
|           | TS-WT     | PGIP-1.50 | CAP-1.041 | CAP-1.092 | 7    |
|           | TS-WT     | CAP-1.089 | CAP-1.041 | CAP-1.092 | 8    |
|           | CAP-1.092 | CAP-1.089 | CAP-1.041 | CAP-1.089 | 9    |
|           | CAP-1.092 | CAP-1.089 | PGIP-1.50 | CAP-1.089 | 10   |
|           | CAP-1.092 | TS-WT     | PGIP-1.50 | CAP-1.089 | 11   |
|           | CAP-1.089 | TS-WT     | PGIP-1.50 | TS-WT     | 12   |
| PGIP-3.08 | CAP-1.089 | TS-WT     | CAP-1.089 | TS-WT     | 13   |
| PGIP-3.08 | CAP-1.089 | PGIP-4.77 | CAP-1.089 | TS-WT     | 14   |
| PGIP-3.08 | CAP-1.151 | PGIP-4.77 | CAP-1.089 | PGIP-4.77 | 15   |
| CAP-1.041 | CAP-1.151 | PGIP-4.77 | TS-WT     | PGIP-4.77 | 16   |
| CAP-1.041 | CAP-1.151 | CAP-1.092 | TS-WT     | PGIP-4.77 | 17   |
| CAP-1.041 | PGIP-3.08 | CAP-1.092 | TS-WT     | CAP-1.151 | 18   |
| PGIP-2.25 | PGIP-3.08 | CAP-1.092 | PGIP-3.08 | CAP-1.151 | 19   |
| PGIP-2.25 | PGIP-3.08 | CAP-1.151 | PGIP-3.08 | CAP-1.151 | 20   |
| PGIP-2.25 | CAP-1.041 | CAP-1.151 | PGIP-3.08 | TS-WT     | 21   |
| PGIP-4.77 | CAP-1.041 | CAP-1.151 | PGIP-2.25 | TS-WT     | 22   |
| PGIP-4.77 | CAP-1.041 | PGIP-4.77 | PGIP-2.25 | TS-WT     | 23   |
| PGIP-4.77 | PGIP-2.25 | PGIP-4.77 | PGIP-2.25 | TS-WT     | 24   |
| PGIP-1.50 | PGIP-2.25 | PGIP-4.77 | CAP-1.041 |           | 25   |

Supplementary Table 2: Transgenic grapevine genotypes planted in Field 2.

| No | Line Designation | Binary Vector | Transgene | Event No.  | No of Plants |
|----|------------------|---------------|-----------|------------|--------------|
| 1  | CAP-1.004        | pDU04.6105    | HNE-CecB  | 0999040-04 | 6            |
| 2  | CAP-1.011        | pDU04.6105    | HNE-CecB  | 0999040-11 | 6            |
| 3  | CAP-1.036        | pDU04.6105    | HNE-CecB  | 0999040-36 | 6            |
| 4  | CAP-1.039        | pDU04.6105    | HNE-CecB  | 0999040-39 | 6            |
| 5  | CAP-1.041        | pDU04.6105    | HNE-CecB  | 0999040-41 | 6            |
| 6  | CAP-1.042        | pDU04.6105    | HNE-CecB  | 0999040-42 | 6            |
| 7  | CAP-1.051        | pDU04.6105    | HNE-CecB  | 0999040-51 | 6            |
| 8  | CAP-1.062        | pDU04.6105    | HNE-CecB  | 0999040-62 | 6            |
| 9  | CAP-1.069        | pDU04.6105    | HNE-CecB  | 0999040-69 | 6            |
| 10 | CAP-1.074        | pDU04.6105    | HNE-CecB  | 0999040-74 | 6            |
| 11 | CAP-1.078        | pDU04.6105    | HNE-CecB  | 0999040-78 | 6            |
| 12 | CAP-1.079        | pDU04.6105    | HNE-CecB  | 0999040-79 | 6            |
| 13 | CAP-1.080        | pDU04.6105    | HNE-CecB  | 0999040-80 | 6            |
| 14 | CAP-1.081        | pDU04.6105    | HNE-CecB  | 0999040-81 | 6            |

|    |           |            |           |             |   |
|----|-----------|------------|-----------|-------------|---|
| 15 | CAP-1.085 | pDU04.6105 | HNE-CecB  | 0999040-85  | 6 |
| 16 | CAP-1.087 | pDU04.6105 | HNE-CecB  | 0999040-87  | 6 |
| 17 | CAP-1.089 | pDU04.6105 | HNE-CecB  | 0999040-89  | 6 |
| 18 | CAP-1.092 | pDU04.6105 | HNE-CecB  | 0999040-92  | 6 |
| 19 | CAP-1.096 | pDU04.6105 | HNE-CecB  | 0999040-96  | 6 |
| 20 | CAP-1.097 | pDU04.6105 | HNE-CecB  | 0999040-97  | 6 |
| 21 | CAP-1.106 | pDU04.6105 | HNE-CecB  | 0999040-106 | 6 |
| 22 | CAP-1.112 | pDU04.6105 | HNE-CecB  | 0999040-112 | 6 |
| 23 | CAP-1.125 | pDU04.6105 | HNE-CecB  | 0999041-125 | 6 |
| 24 | CAP-1.132 | pDU04.6105 | HNE-CecB  | 0999041-132 | 6 |
| 25 | CAP-1.146 | pDU04.6105 | HNE-CecB  | 0999041-146 | 6 |
| 26 | CAP-1.151 | pDU04.6105 | HNE-CecB  | 0999041-151 | 6 |
| 27 | CAP-1.155 | pDU04.6105 | HNE-CecB  | 0999041-155 | 6 |
| 28 | CAP-1.157 | pDU04.6105 | HNE-CecB  | 0999041-157 | 6 |
| 29 | CAP-1.164 | pDU04.6105 | HNE-CecB  | 0999041-164 | 6 |
| 30 | CAP-1.166 | pDU04.6105 | HNE-CecB  | 0999041-166 | 6 |
| 31 | CAP-1.168 | pDU04.6105 | HNE-CecB  | 0999041-168 | 6 |
| 32 | CAP-1.179 | pDU04.6105 | HNE-CecB  | 0999041-179 | 6 |
| 33 | CAP-1.180 | pDU04.6105 | HNE-CecB  | 0999041-180 | 6 |
| 34 | CAP-1.181 | pDU04.6105 | HNE-CecB  | 0999041-181 | 6 |
| 35 | CAP-1.007 | pDA05.0525 | pHNE-CecB | 099944-007  | 6 |
| 36 | CAP-1.002 | pDA05.0525 | pHNE-CecB | 099946-002  | 6 |
| 37 | CAP-1.014 | pDA05.0525 | pHNE-CecB | 099946-014  | 6 |
| 38 | CAP-1.018 | pDA05.0525 | pHNE-CecB | 099946-018  | 6 |
| 39 | CAP-1.019 | pDA05.0525 | pHNE-CecB | 099946-019  | 6 |
| 40 | CAP-1.016 | pDA05.0525 | pHNE-CecB | 061073-016  | 6 |
| 41 | CAP-1.028 | pDA05.0525 | pHNE-CecB | 061073-028  | 6 |
| 42 | CAP-1.036 | pDA05.0525 | pHNE-CecB | 061073-036  | 6 |
| 43 | PGIP-1.50 | pDU94.0928 | pearPGIP  | TS-50       | 6 |
| 44 | PGIP-2.17 | pDU05.1002 | mPGIP     | 061131-17   | 6 |
| 45 | PGIP-2.22 | pDU05.1002 | mPGIP     | 061131-22   | 6 |
| 46 | PGIP-2.25 | pDU05.1002 | mPGIP     | 061131-25   | 6 |
| 47 | PGIP-2.27 | pDU05.1002 | mPGIP     | 061131-27   | 6 |
| 48 | PGIP-2.28 | pDU05.1002 | mPGIP     | 061131-28   | 6 |
| 49 | PGIP-2.29 | pDU05.1002 | mPGIP     | 061131-29   | 6 |
| 50 | PGIP-2.32 | pDU05.1002 | mPGIP     | 061131-32   | 6 |
| 51 | PGIP-2.35 | pDU05.1002 | mPGIP     | 061131-35   | 6 |
| 52 | PGIP-3.07 | pDU05.1910 | ntPGIP    | 061034-007  | 6 |
| 53 | PGIP-3.08 | pDU05.1910 | ntPGIP    | 061052-008  | 6 |
| 54 | PGIP-3.10 | pDU05.1910 | ntPGIP    | 061034-010  | 6 |
| 55 | PGIP-3.16 | pDU05.1910 | ntPGIP    | 061052-016  | 6 |
| 56 | PGIP-3.27 | pDU05.1910 | ntPGIP    | 061036-27   | 6 |
| 57 | PGIP-3.30 | pDU05.1910 | ntPGIP    | 061036-30   | 6 |
| 58 | PGIP-4.15 | pDU06.0201 | chiPGIP   | 061045-015  | 6 |
| 59 | PGIP-4.32 | pDU06.0201 | chiPGIP   | 061045-032  | 6 |

|    |           |            |          |            |     |
|----|-----------|------------|----------|------------|-----|
| 60 | PGIP-4.35 | pDU06.0201 | chiPGIP  | 061045-035 | 6   |
| 61 | PGIP-4.56 | pDU06.0201 | chiPGIP  | 061045-056 | 6   |
| 62 | PGIP-4.70 | pDU06.0201 | chiPGIP  | 061045-070 | 6   |
| 63 | PGIP-4.77 | pDU06.0201 | chiPGIP  | 061045-077 | 6   |
| 64 | PGIP-4.78 | pDU06.0201 | chiPGIP  | 061045-078 | 6   |
| 65 | PGIP-4.83 | pDU06.0201 | chiPGIP  | 061045-083 | 6   |
| 66 | PGIP-5.02 | pDA05.XSP  | xspPGIP  | 061133-02  | 6   |
| 67 | PGIP-5.21 | pDA05.XSP  | xspPGIP  | 061133-21  | 6   |
| 68 | PGIP-5.23 | pDA05.XSP  | xspPGIP  | 061133-23  | 6   |
| 69 | PGIP-5.24 | pDA05.XSP  | xspPGIP  | 061133-24  | 6   |
| 70 | PGIP-5.27 | pDA05.XSP  | xspPGIP  | 061133-27  | 6   |
| 71 | PGIP-6.19 | pDU05.0401 | RamyPGIP | 061132-19  | 6   |
| 72 | PGIP-6.24 | pDU05.0401 | RamyPGIP | 061132-24  | 6   |
| 73 | PGIP-6.28 | pDU05.0401 | RamyPGIP | 061132-28  | 5   |
| 74 | PGIP-6.30 | pDU05.0401 | RamyPGIP | 061132-30  | 6   |
| 75 | PGIP-6.32 | pDU05.0401 | RamyPGIP | 061132-32  | 6   |
| 76 | PGIP-6.33 | pDU05.0401 | RamyPGIP | 061173-33  | 6   |
| 77 | PGIP-6.40 | pDU05.0401 | RamyPGIP | 061173-40  | 4   |
| 78 | WT-TS     |            |          |            | 140 |

Supplementary Table 3: Field map of genotypes planted in Field 2.

| Row 1 | Row 2 | Row 3     | Row 4     | Row 5     | Row 6     | Row 7     | Row 8     | Row 9     | Row 10    |
|-------|-------|-----------|-----------|-----------|-----------|-----------|-----------|-----------|-----------|
| TS-WT | TS-WT | CAP-1.007 | CAP-1.080 | PGIP-2.22 | PGIP-2.28 | CAP-1.036 | CAP-1.125 | PGIP-4.35 | PGIP-5.02 |
| TS-WT | TS-WT | CAP-1.007 | CAP-1.080 | PGIP-2.22 | PGIP-2.28 | CAP-1.036 | CAP-1.125 | PGIP-4.35 | PGIP-5.02 |
| TS-WT | TS-WT | CAP-1.007 | CAP-1.080 | PGIP-2.22 | PGIP-2.28 | CAP-1.036 | CAP-1.125 | PGIP-4.35 | PGIP-5.02 |
| TS-WT | TS-WT | CAP-1.002 | CAP-1.081 | CAP-1.180 | PGIP-2.29 | CAP-1.039 | CAP-1.132 | PGIP-4.56 | PGIP-5.27 |
| TS-WT | TS-WT | CAP-1.002 | CAP-1.081 | CAP-1.180 | PGIP-2.29 | CAP-1.039 | CAP-1.132 | PGIP-4.56 | PGIP-5.27 |
| TS-WT | TS-WT | CAP-1.002 | CAP-1.081 | CAP-1.180 | PGIP-2.29 | CAP-1.039 | CAP-1.132 | PGIP-4.56 | PGIP-5.27 |
| TS-WT | TS-WT | CAP-1.014 | CAP-1.085 | CAP-1.181 | PGIP-2.32 | CAP-1.041 | CAP-1.146 | PGIP-4.70 | PGIP-6.19 |
| TS-WT | TS-WT | CAP-1.014 | CAP-1.085 | CAP-1.181 | PGIP-2.32 | CAP-1.041 | CAP-1.146 | PGIP-4.70 | PGIP-6.19 |
| TS-WT | TS-WT | CAP-1.014 | CAP-1.085 | CAP-1.181 | PGIP-2.32 | CAP-1.041 | CAP-1.146 | PGIP-4.70 | PGIP-6.19 |
| TS-WT | TS-WT | CAP-1.018 | CAP-1.087 | PGIP-3.07 | PGIP-2.35 | CAP-1.042 | CAP-1.151 | PGIP-4.77 | PGIP-6.24 |
| TS-WT | TS-WT | CAP-1.018 | CAP-1.087 | PGIP-3.07 | PGIP-2.35 | CAP-1.042 | CAP-1.151 | PGIP-4.77 | PGIP-6.24 |
| TS-WT | TS-WT | CAP-1.018 | CAP-1.087 | PGIP-3.07 | PGIP-2.35 | CAP-1.042 | CAP-1.151 | PGIP-4.77 | PGIP-6.24 |
| TS-WT | TS-WT | CAP-1.019 | CAP-1.089 | PGIP-3.10 | PGIP-6.30 | CAP-1.051 | CAP-1.155 | PGIP-4.78 | PGIP-6.28 |
| TS-WT | TS-WT | CAP-1.019 | CAP-1.089 | PGIP-3.10 | PGIP-6.30 | CAP-1.051 | CAP-1.155 | PGIP-4.78 | PGIP-6.28 |
| TS-WT | TS-WT | CAP-1.019 | CAP-1.089 | PGIP-3.10 | PGIP-6.30 | CAP-1.051 | CAP-1.155 | PGIP-4.78 | PGIP-6.28 |
| TS-WT | TS-WT | CAP-1.016 | CAP-1.092 | PGIP-3.27 | PGIP-6.32 | CAP-1.062 | CAP-1.157 | PGIP-4.83 | PGIP-6.33 |
| TS-WT | TS-WT | CAP-1.016 | CAP-1.092 | PGIP-3.27 | PGIP-6.32 | CAP-1.062 | CAP-1.157 | PGIP-4.83 | PGIP-6.33 |
| TS-WT | TS-WT | CAP-1.016 | CAP-1.092 | PGIP-3.27 | PGIP-6.32 | CAP-1.062 | CAP-1.157 | PGIP-4.83 | PGIP-6.33 |
| TS-WT | TS-WT | CAP-1.028 | CAP-1.096 | PGIP-3.30 | PGIP-5.21 | CAP-1.069 | CAP-1.164 | PGIP-2.17 |           |





Supplementary Figures:

Supplementary Fig 1: Maps of the binary vectors used to create the lines tested in this study.

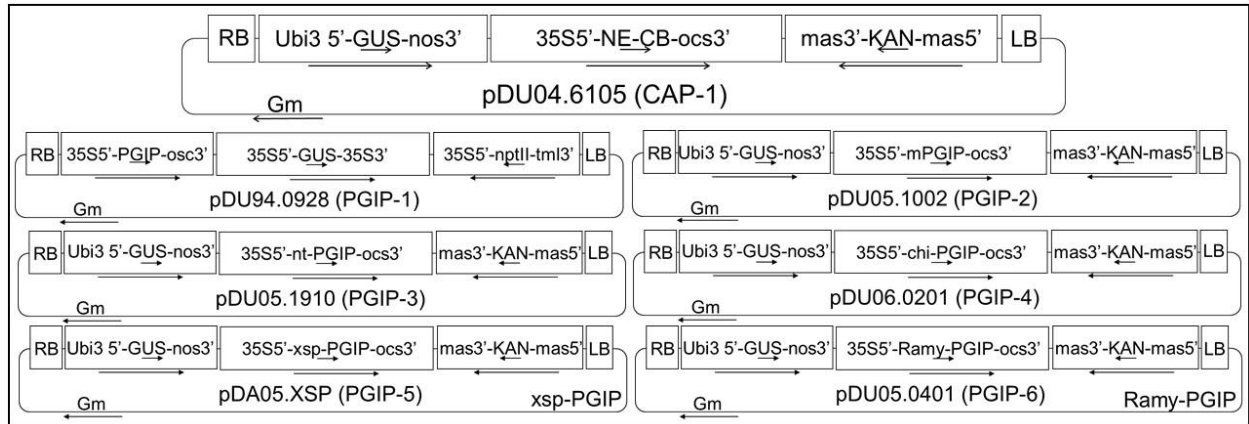

Supplementary Fig 2: Observed frequency of bud break in each infected cane in Field 1 in year four.

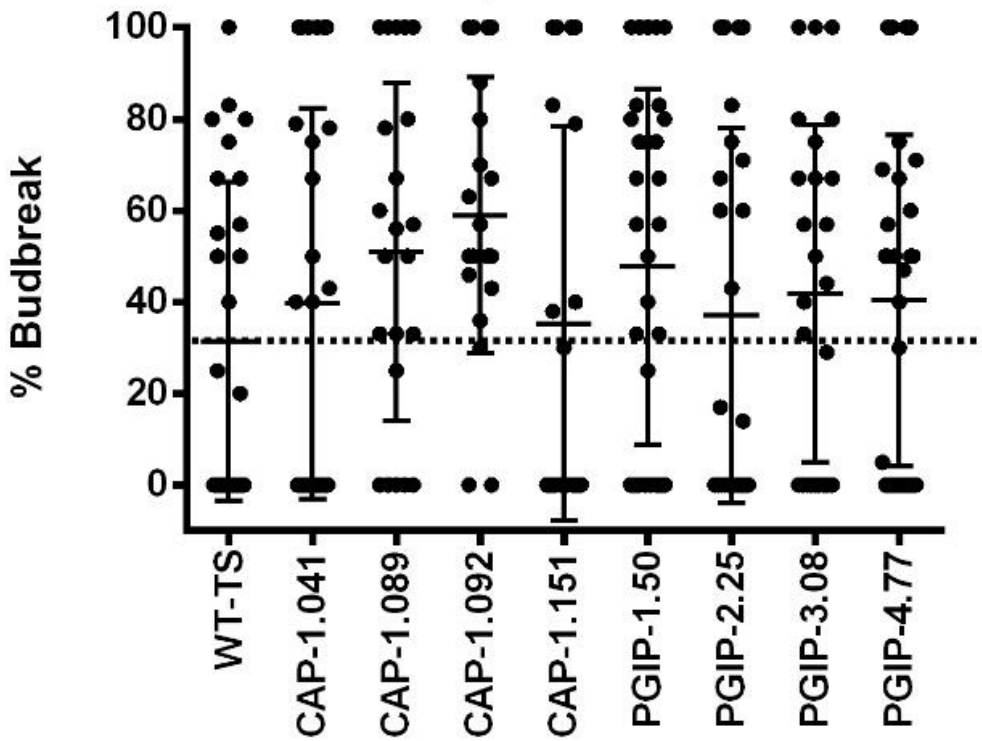

Supplementary Figure 3: Quantification of PGIP protein secreted into the xylem during radial diffusion analysis of xylem sap extracted from transgenic PGIP-expressing grapevines in Field 2.

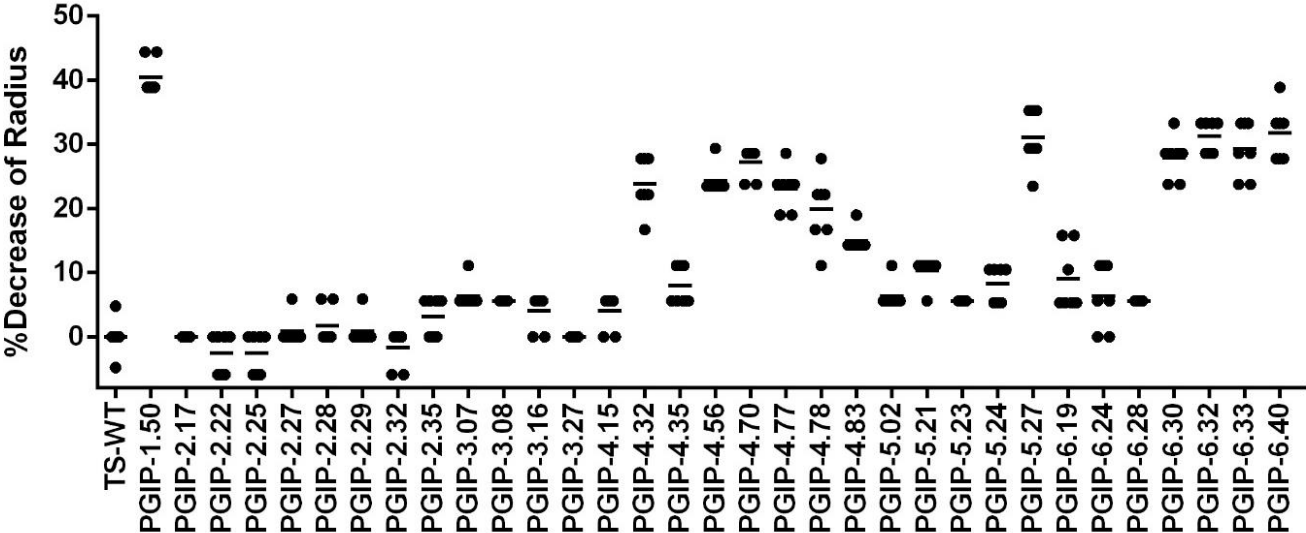

Supplement: Data_Sheet_1.pdf [file Data_Sheet_1.pdf]
